# Supplementary material for: Reaction between perfluoroaldehydes and hydroperoxy radical in the atmosphere: Reaction mechanisms, reaction kinetics modelling, and atmospheric implications
Source: Copernicus journal article supplement (doi:10.5194/egusphere-2024-4179), 2025-03-07
Supplement: Supplementary file [file egusphere-2024-4179-AC3-supplement.pdf]

**Response to the community #1 Comments for the manuscript** “Reaction between perfluoroaldehydes and hydroperoxy radical in the atmosphere: Reaction mechanisms, reaction kinetics modelling, and atmospheric implications”

**Comment:** Line 95: In addition, multi-structural torsional anharmonicity involving reactant and transition state were all calculated using MS-T method (multi-structural method for torsional anharmonicity. How was this done? Can you please elaborate.

**Response:**

**(a)Theoretical background**

The complete conformational-rotational-vibrational partition functions involving reactant and transition state have been all calculated by using MS-T method (multistructural method for torsional anharmonicity)(Zheng and Truhlar, 2013) and executed through MStor program package.(Chen et al., 2023) In general, the conformational-rotational-vibrational partition function is calculated as,

$$Q_{con-rovib}^{MS-T,X} = \sum_{j=1}^J Q_{rot,j} \exp(-\beta U_j) Q_j^{HO} Z_j \prod_{t=1}^t f_{j,\tau} \quad (1)$$

where “con” and “rovib” denote conformation and rotation-vibration, respectively,  $J$  is the number of distinguishable conformational structures ( $j = 1, 2, \dots, J$ ).  $\beta = 1/k_b T$  and  $X$  labels reactants, products or transition states.  $Q_{rot,j}$ ,  $U_j$  and  $Q_j^{HO}$  represent the classical rotational partition of structure  $j$ , energy gap relative to the global minimum energy structure, and the normal-mode harmonic oscillator vibration partition function of the  $J^{th}$  structure, respectively.  $Z_j$  is a factor to ensure that the MS-T scheme reaches the correct high-Temperature limit (within the parameter range of the model), and  $f_{j,\tau}$  is an internal coordinate torsional nonharmonic function that adjusts the harmonic partition function of structure  $j$  to account for torsional motion  $\tau$ .

When equation (1) is used for a single-structure (SS) rotation-vibrational partition function of the conformer  $j$  (generally, the global minima structure ( $j = 1$ )), and if  $Z_j$  and  $f_{j,\tau}$  were set to 1, the partition function  $Q_{con-rovib}^{MS-T,X}$  reduces to the multi-structural local-harmonic (MS-LH) partition function. Thus,we can rewrite it as

$$Q_{rovib,j}^{SS-HO} = Q_{rot,j} \exp(-\beta U_j) Q_{vib,j}^{HO} \quad (2)$$

Subsequently, the multistructural torsional anharmonicity factor  $F^{MS-T,X}$  will be defined for reactants and transition states by using equation (1) and (2) as shown below

$$F^{MS-T,X} = Q_{con-rovib}^{MS-T,X} / Q_{rovib,1}^{SS-HO} \quad (3)$$

also, the corresponding multistructural torsional anharmonicity factor for the reaction

$$F^{MS-T,X} = Q_{sp}^{MS-T} / Q_R^{MS-T} \quad (4)$$

The reaction rate constant for biomolecular was calculated as

$$k^{MS-T} = \kappa \sigma \frac{k_B T}{h} \frac{Q_{elec}^{\ddagger} Q_{con-rovib}^{MS-T,\ddagger}}{N_a Q_{elec}^R Q_{con-rovib}^{MS-T,R}} \exp(-\beta V^{\ddagger}) \quad (5)$$

where  $k_b$  is Boltzmann's constant, T is the temperature, N is Avogadro's number,  $h$  is Planck's constant, and  $\beta$  is  $1/k_b T$ .  $V^{\ddagger}$  denotes the classic reaction energy barrier exclude ZPE correction.  $Q_{elec}$  represent electronic partition function, while  $\kappa$  and  $\sigma$  denote Eckart tunneling coefficient and the reaction symmetry number, respectively.

## (b) Calculated details

(1) Conformational Search: Use **ConfGen.exe** to generate initial structures by rotating specified bonds

(2) Geometry Optimization & Frequency Calculation: Optimize structures using Gaussian and remove duplicates (e.g., mirrored/rotationally equivalent structures). Run frequency calculations to obtain Hessians and energies.

(3) Distinct Structure Identification: Use **mvinput.exe** to exclude mirror images and rotationally redundant structures. Generate *mvorm.inp* for Voronoi tessellation

(4) Torsional Periodicity ( $M_{j,\tau}$ ): Compute  $M_{j,\tau}$  values using **mcvorm.exe** (Monte Carlo) or **vorm.exe** (Voronoi tessellation).

(5) Input File Generation: Combine Gaussian .fchk files into *all.fchk*. Use **msinput.exe** to generate *mstor.inp* and *hess.dat*, adding uncoupled torsions.

(6) Execution: Run **mstor.exe** with the MS-T(CD) method to calculate partition functions and thermodynamic properties.

## (c) Input files for the ConfGen.exe executable

13 2

C            1.01911500   -0.47626600   0.05443400

```

C      2.35234900  0.19807600  0.44862800
H      2.51946100  0.29297300  1.53563000
C     -0.15660500  0.51749400  0.11794900
O      3.12769000  0.56284200 -0.38553200
F      0.04052700  1.46045400 -0.81804700
F     -0.13406100  1.10278400  1.33631400
F      1.10175100 -0.98403000 -1.18192700
F      0.78274500 -1.47995300  0.93436300
C     -1.56560300 -0.07991200 -0.09014200
F     -2.45510800  0.91017100 -0.11075900
F     -1.62361100 -0.73826800 -1.24442900
F     -1.87185600 -0.91027500  0.90264400
#torsion 1 definition
2 1
3
5 2 3
3
0.0 120.0 -120.0
#torsion 2 definition
1 4
6
1 8 9 2 3 5
3
0.0 120.0 -120.0
%nprocshared=12
%mem=80GB
# M062x/gen opt=calcfc int=grid=99974 scf=conver=11
0 1
@/home/zgdong/mg3s.gbs
Extbasis

```

## Reference

Chen, W., Zheng, J., Bao, J. L., Truhlar, D. G., and Xu, X.: MSTor 2023: A new version of the computer code for multistructural torsional anharmonicity, now with automatic torsional identification using redundant internal coordinates, *Computer Physics Communications*, 288, 108740, <https://doi.org/10.1016/j.cpc.2023.108740>, 2023.

Zheng, J. and Truhlar, D. G.: Quantum thermochemistry: Multistructural method with torsional anharmonicity based on a coupled torsional potential, *Journal of Chemical Theory and Computation*, 9, 1356–1367, <https://doi.org/10.1021/ct3010722>, 2013.
